# Supplementary material
Source: Springer Nature journal article supplement (https://www.springermedizin.de/resource/supplementary/12889_2011_3374_MOESM2_ESM.pdf/9488870)

### Diagnoses from baseline 1997

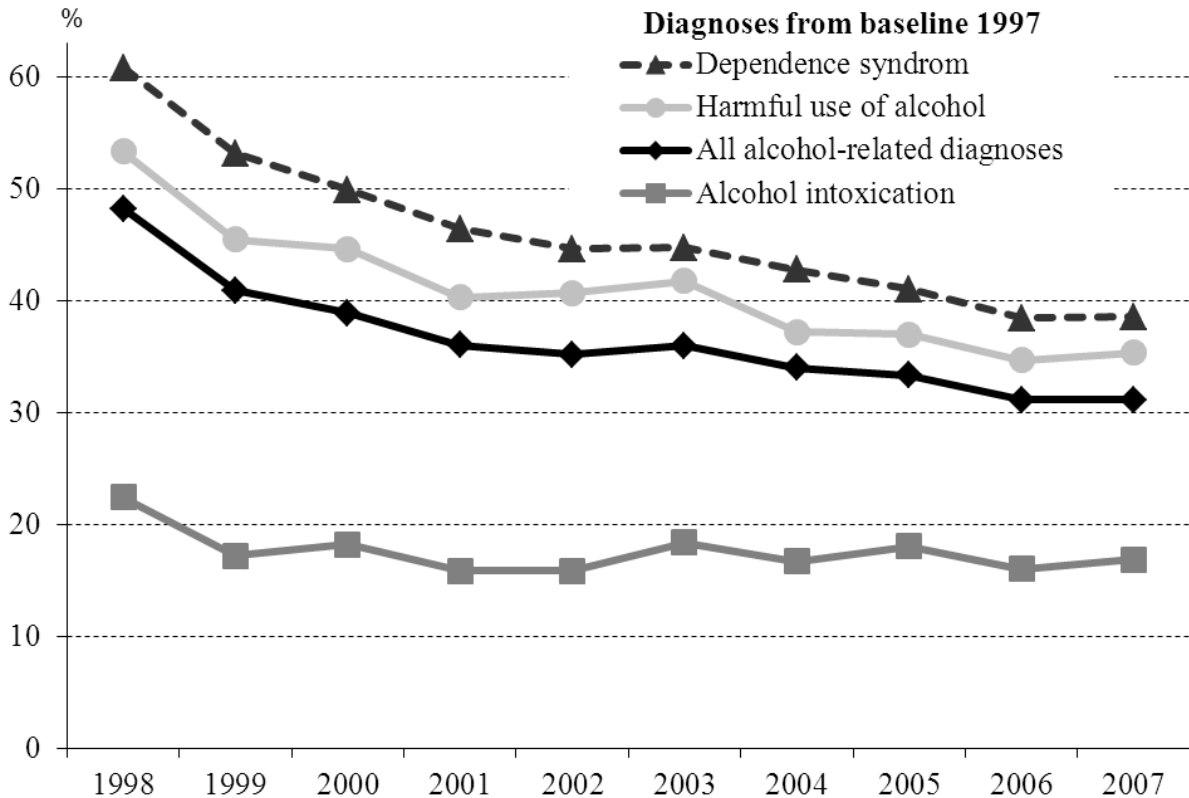

Supplement: MOESM2 [file 9488870]
